# Supplementary material for: Glycosylation of ALV-J Envelope Protein at Sites 17 and 193 Is Pivotal in the Virus Infection
Source: PubMed Central journal article supplement (PMC8865534; doi:10.1128/jvi.01549-21), 2022-02-23
Supplement: jvi.01549-21-s0001.pdf [file jvi.01549-21-s0001.pdf]

**Table S1** ALV-J strains used for analyzing NGSs

| <b>Isolate</b>    | <b>Accession no.</b> | <b>Isolate</b>    | <b>Accession no.</b> | <b>Isolate</b>    | <b>Accession no.</b> |
|-------------------|----------------------|-------------------|----------------------|-------------------|----------------------|
| <b>HPRS103</b>    | Z46390               | <b>SDAU1102</b>   | KU159178             | <b>GX20YL05</b>   | MW491266             |
| <b>NX0101</b>     | AY897227             | <b>SD1109</b>     | KF768000             | <b>HN1001-2</b>   | HQ260975             |
| <b>Js-nt</b>      | HM235667             | <b>WB1106j</b>    | JX570795             | <b>GX12NN20</b>   | KT598483             |
| <b>JS09GY3</b>    | GU982308             | <b>WB11058J</b>   | JX570793             | <b>NHH</b>        | HM235668             |
| <b>SCAU-HN06</b>  | KQ900844             | <b>WB11098(J)</b> | JX848322             | <b>PK19SA01</b>   | MN956380             |
| <b>TBC-J6</b>     | MT409625             | <b>SD100502J</b>  | HQ270188             | <b>10022-16</b>   | GU222400             |
| <b>TBC-J4</b>     | MT409624             | <b>HLJ09SH02</b>  | HQ634807             | <b>LN08SY10</b>   | HQ634802             |
| <b>GD1407</b>     | KU500034             | <b>SDAU1704</b>   | KY980660             | <b>SCAU11-XG</b>  | KC149971             |
| <b>GX14HG01</b>   | KU997685             | <b>DBYJ1102</b>   | KC875858             | <b>GD1109</b>     | JX254901             |
| <b>GD18QY22</b>   | MN262620             | <b>GX20YL09</b>   | MW491270             | <b>JL1801</b>     | MN419348             |
| <b>GD14J2</b>     | KU500032             | <b>WSC112</b>     | KJ631322             | <b>YZ9902</b>     | HM235670             |
| <b>GD17FS01</b>   | MN262599             | <b>HAY013</b>     | HM235665             | <b>Hc1</b>        | AF247391             |
| <b>JX19ND03</b>   | MN262539             | <b>NM2002-1</b>   | HM235669             | <b>SDAU1702</b>   | KY980658             |
| <b>JX19TH01</b>   | MN262528             | <b>IMC10200</b>   | AY234051             | <b>FJ201306</b>   | KM655820             |
| <b>JL1802</b>     | MN419349             | <b>SDC2000</b>    | AY234052             | <b>SCMZ92</b>     | KF796647             |
| <b>GD13GZ</b>     | KU500030             | <b>GD17ZQ06</b>   | MN262604             | <b>HuB09JY04</b>  | JN378888             |
| <b>WGZ13</b>      | KJ631313             | <b>SD9901</b>     | AY897220             | <b>ZB110604-6</b> | KC841157             |
| <b>JL1803</b>     | MN419350             | <b>4817</b>       | AF247385             | <b>ZB110604-5</b> | KC841156             |
| <b>XX2-09</b>     | HM775331             | <b>SD0002</b>     | AY897224             | <b>ZB110604-3</b> | KC841154             |
| <b>SD1804</b>     | MN419338             | <b>SD9902</b>     | AY897221             | <b>GX14HG03</b>   | KY983569             |
| <b>GM209-4</b>    | MH379645             | <b>JS1807</b>     | MN419341             | <b>CAHHM01</b>    | HM640944             |
| <b>GM209-5</b>    | MH379646             | <b>SDMG1801</b>   | MN413674             | <b>JS09GY6</b>    | GU982310             |
| <b>HB1801</b>     | MN419352             | <b>TJ1801</b>     | MN419353             | <b>HLJ13SH01</b>  | KM376510             |
| <b>LH20180301</b> | MK944404             | <b>GD18JM01</b>   | MT538241             | <b>HB2010001</b>  | MZ197985             |
| <b>SD1810</b>     | MN419347             | <b>JS14NT02</b>   | MN735302             | <b>JL093-1</b>    | JN624878             |
| <b>JS1808</b>     | MN419342             | <b>CAUSY01</b>    | JF932001             | <b>JL08CH3-1</b>  | HQ634809             |
| <b>JS1806</b>     | MN419340             | <b>sdau1002</b>   | JN389518             |                   |                      |

**Table S2** Primers used for constructing mutant infectious clones of ALV-J

| <b>Primer</b> | <b>Sequence</b>                                                                  |
|---------------|----------------------------------------------------------------------------------|
| N17           | TGGGTCACCTGGGCATATAAGACGGGCCAAAC<br>GTTTGGCCCGTCTTATATGCCAGGTGACCCA              |
| N62           | GCTACTGCTTGCGAATATGACACCGATTAGC<br>GCTAAATCGGTGTCATATTCGCAAGCAGTAGC              |
| N78           | ATGTTTAATACAGACTCTATATACGACCCTCCCTTG<br>CAAGGGAGGGTCGTATATAGAGTCTGTATTAACAT      |
| N98           | GGTCCCAAATGATCAAGTATGGAACAAAACGTACGTG<br>CACGTACGTTTTGTTCCATACTTGATCATTGGGACC    |
| N116          | TGTGCTATAAAGAGAACTATCGCAGTAGCAGTAG<br>CTACTGCTACTGCGATAGTTCTCTTTATAGCACA         |
| N131          | CATTTTGGATGGGAATTTTATGGGACTGGTGGGG<br>CCCCACCAGTCCCATAAAAATTCCCATCAAAAATG        |
| N159          | CTTATAAGACCCTATGTCTATCAATCATGGACGATGGT<br>ACCATCGTCCATGATTGATAGACATAGGGTCTTATAAG |
| N185          | TTGTGGATTCACCAGCTATGAGACTCGTTATTATAGC<br>GCTATAATAACGAGTCTCATAGCTGGTGAATCCACAA   |
| N193          | CTCGTTATTATAGCGGGTATTATTCCGATTGGTGTAG<br>CTACACCAATCGGAATAATACCCGCTATAATAACGAG   |
| N209          | GAATGGTCAGGTGGTTATTGCACGGCGGAAT<br>ATTCCGCCGTGCAATAACCACCTGACCATTG               |
| N226          | GTTTACCTTCAGGACGTATGAGTCAGAGGTGTT<br>AACACCTCTGACTCATACGTCCTGAAGGTAAAC           |
| N234          | CAGAGGTGTTGTGGAATTATGGGACTGCTAAGGC<br>GCCTTAGCAGTCCCATAATTCCACAACACCTCTG         |
| N284          | ATGACGTATGGGCCGTATATTACGGGTCACCGC<br>GCGGTGACCCGTAATATACGGCCCATACGTCAT           |
